# Supplementary material for: Lipid Secretion by Parasitic Cells of Coccidioides Contributes to Disseminated Disease
Source: PubMed Central journal article supplement (PMC8155295; doi:10.3389/fcimb.2021.592826), 2021-05-13

**Supplemental material 1:**

**FIGURE S1.**

Western blot showing the lack of the SOWgp protein

**Line 1: lipids extracted from SOW**

**Line 2: SOW**

**MW    1    2**

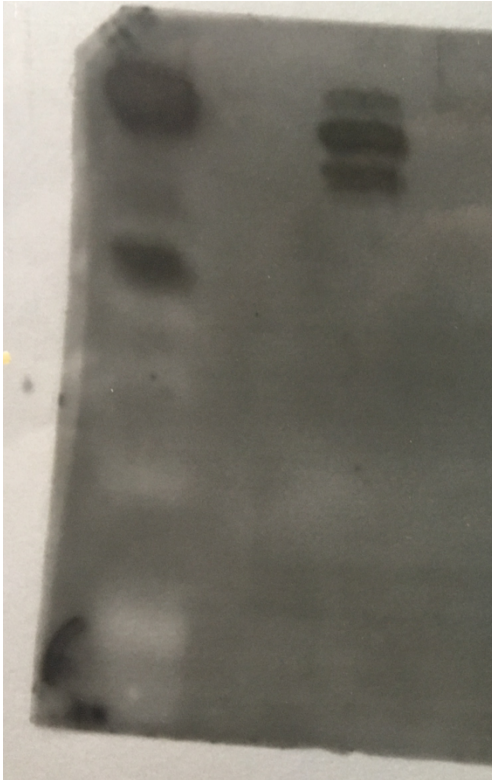

Supplement: DataSheet_1.pdf [file DataSheet_1.pdf]
