# Supplementary material for: Lipid Secretion by Parasitic Cells of Coccidioides Contributes to Disseminated Disease
Source: PubMed Central journal article supplement (PMC8155295; doi:10.3389/fcimb.2021.592826), 2021-05-13
Supplement: DataSheet_2.pdf [file DataSheet_2.pdf]

## Supplemental material 2:

### Confirmation of the neutrophils isolated from the mice via flow cytometry:

After the Ficoll-Paque density gradient, we analyzed by flow cytometry the cells recovered. In the first experiment we stained with: CD11b+, Ly6G+ and Cd11+Ly6G+ antibodies. In the second experiment we used: CD45+, Ly6G+; Mac3+, CD11b+Ly6G+, CD11b+Mac3+, CD11b+Ly6g-, CD11b+Mac3-. In the third experiment the cells recovered were analyzed as follow: CD45+, CD11b+ IN CD45+, CD11b+Ly6G+, CD11b+ Mac3+, Ly6G+ IN CD45 and mac3 In CD45+. In the experiment number 4, the cells were stained withCD45+, CD11b+Ly6G+and CD11b+Mac3+. The medians of percentage of CD11+Ly6G+ positive cells is shown in TABLE S2.

**TABLE S2. CD11+Ly6G+ positive cells after the Ficoll-Paque density gradient.**

| CD11+Ly6G+ ( Median of %) |        |
|---------------------------|--------|
| C57BL/6                   | DBA/2J |
| 60.6                      | 49.7   |
