# Supplementary material for: Lipid Secretion by Parasitic Cells of Coccidioides Contributes to Disseminated Disease
Source: PubMed Central journal article supplement (PMC8155295; doi:10.3389/fcimb.2021.592826), 2021-05-13
Supplement: DataSheet_3.pdf [file DataSheet_3.pdf]

### Supplemental material 3:

The *Coccidioides* SOW lipids did not affect the viability of C57BL/6 and DBA/2J neutrophils as it was determined with CFDA and Annexin V staining by flow cytometry (FIGURE S3)

The percentage of live cells was determined by CFDA positive and Annexin V negative; the percentage of early apoptotic cells was determined as Annexin V and CFDA positive cells and the percentage of late apoptotic cells was determined by Annexin V positive and CFDA negative cells. The results are shown as the median of percentage between the findings of the three experiments performed (TABLE S3).

**FIGURE S3. *Coccidioides* SOW lipids did not affect the viability of C57BL/6 and DBA/2J neutrophils.**

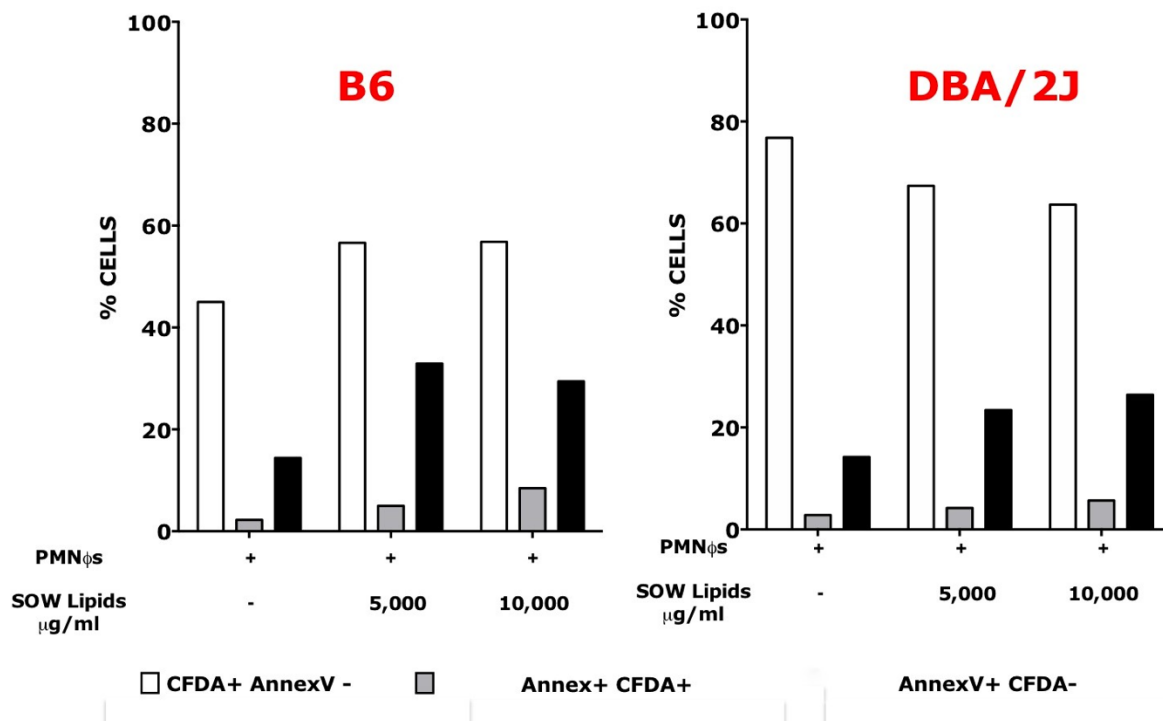

**TABLE S3. Annexin V and CFDA staining of neutrophils treated with different concentrations of SOW lipids.**

|                                              | ANNEXIN V+<br>(MEDIAN OF %) |        | ANNEXIN V +<br>CFDA +<br>(MEDIAN OF %) |        | CFDA +<br>(MEDIAN OF %) |        |
|----------------------------------------------|-----------------------------|--------|----------------------------------------|--------|-------------------------|--------|
|                                              | C57BL/6                     | DBA/2J | C57BL/6                                | DBA/2J | C57BL/6                 | DBA/2J |
| <b>Neutrophils</b>                           | 11.31                       | 16.5   | 4.44                                   | 3.45   | 77.05                   | 74.95  |
| <b>Neutrophils+1000ug/ml<br/>SOW lipids</b>  | 49.9                        | ————   | 3.81                                   | ————   | 66.7                    |        |
| <b>Neutrophils+5000ug/ml<br/>SOW lipids</b>  | 42.1                        | 20.8   | 4.98                                   | 4.59   | 56.6                    | 70.8   |
| <b>Neutrophils+10000ug/ml<br/>SOW lipids</b> | 29.4                        | 26.4   | 5.6                                    | 5.68   | 70.6                    | 63.7   |
